Title : IN VITRO 4-AMINOPYRIDINE-ANTICHOLINESTERASE INTERACTION  
Authors : F. F. Foldes, M.D., I. Chaudhry, D. V. M., L. Sokol, H. Nagashima, M.D.  
Affiliation: Departments of Anesthesiology, Montefiore Hospital and Medical Center and Albert Einstein College of Medicine, Bronx, New York 10467

**Introduction.** It has been reported that 4-aminopyridine (4-APYR) reliably antagonizes nondepolarization block in man and is free of unwanted side effects<sup>1</sup>. In contrast, Miller et al<sup>2</sup> found that 4-APYR is a poor antagonist of profound neuromuscular (n.m.) block in man. They observed, however, that satisfactory reversal of the n.m. block could be achieved by combinations of relatively small doses of 4-APYR and anticholinesterases both in rats<sup>2</sup> and man<sup>3</sup>. The present study was undertaken to compare in vitro the antagonism of nondepolarizing block by 4-APYR, neostigmine or pyridostigmine alone or by various combinations of these two types of agents.

**Methods.** The experiments were carried out on the rat phrenic nerve-hemidiaphragm preparation suspended in an organ bath in mammalian Krebs' solution, aerated with 95% O<sub>2</sub> - 5% O<sub>2</sub>, at 37°C. The hemidiaphragms were exposed to a resting tension of 10 g and were indirectly stimulated at the rate of 0.1 Hz with supramaximal square wave pulses of 0.1 msec duration. The isometric twitch tension was recorded with a FT03 transducer on a Grass polygraph. The effect on the twitch tension of 4-APYR, neostigmine or pyridostigmine or those of combinations of 4-APYR with the two anticholinesterases was determined in some experiments in the absence of relaxants and in others after an about 90% n.m. block was produced by d-tubocurarine (d-Tc) or pancuronium.

**Results.** In the absence of relaxants the preliminary administration of a marginally effective concentration of 4-APYR decreased the concentrations of neostigmine and pyridostigmine required to increase the twitch by 50% of control by a factor of about 10 ( $p < 0.001$ ). The preliminary administration of neostigmine or pyridostigmine had similar effect on the ED<sub>50</sub> of 4-APYR. The ED<sub>50</sub> values of the compounds administered alone or preceded by another type of antagonist, for the reversal of an about 90% d-Tc induced n.m. block are summarized in table 1. The data indicate that the preliminary addition of a marginally effective concentration of 4-APYR significantly decreases the ED<sub>50</sub> of neostigmine or pyridostigmine and that the preliminary administration of either of the two anticholinesterases has a similar effect on the ED<sub>50</sub> of 4-APYR. Similar results were obtained with pancuronium.

**Discussion.** Our *in vitro* findings on the mutual increase of the antagonist effects of 4-APYR and anticholinesterases are in agreement with the *in vivo* observations of Miller et al<sup>2,3</sup>. This mutual "potentiation" of the antagonist effect may be explained by the dif-

ferent mechanism of action of the two types of antagonists. 4-APYR increases presynaptic acetylcholine (ACh) release and it augments the contractile strength of the muscle<sup>4</sup>. The primary effect of neostigmine or pyridostigmine is inhibition of the hydrolysis of ACh released by the nerve impulse. Because of the 4-APYR induced increased ACh release, the ACh concentration required for the competitive displacement of n.m. blocking agents from the cholinergic receptors of the postjunctional membrane, can be achieved with relatively low concentrations of anticholinesterases. The restoration of muscle strength is further enhanced by the direct beneficial effect of 4-APYR on the contractility of the muscle fibers.

#### References.

1. Stoyanov E, Vulchev P, Shturbova M, et al: Clinical electromyographic and electromyographic studies in decurarization with Pymadine. *Anaesth Resusc Intensive Ther* 4:139-143, 1976.
2. Miller RD, Dennissen PA, van de Pol F, et al: Potentiation of neostigmine and pyridostigmine by 4-aminopyridine in the rat. *J Pharm Pharmacol* 30:699-702, 1978.
3. Miller RD, Booi LHDJ, Agoston S, et al: 4-Aminopyridine potentiates neostigmine and pyridostigmine in man. *Anesthesiology* (In press)
4. Foldes FF, Agoston S, van de Pol F, et al: The in vitro neuromuscular effects of 4-aminopyridine and its interaction with neuromuscular blocking agents (Abstr). American Society of Anesthesiologists Annual Meeting, 1976, pp 179-180.

Table 1. Antagonism of the d-Tubocurarine Induced Neuromuscular Block by 4-Aminopyridine, Neostigmine, Pyridostigmine and by Combinations of these Agents.

| Antagonists                          | ED50<br>ng/ml            |
|--------------------------------------|--------------------------|
| 4-Aminopyridine                      | 192.5±22.87 <sup>1</sup> |
| Neostigmine                          | 3.1± 0.17                |
| Pyridostigmine                       | 27.5± 1.16               |
| 4-APYR → Neostigmine                 | 1.0± 0.12*               |
| 4-APYR → Pyridostigmine              | 6.1± 0.61*               |
| Neostigmine <sup>3</sup> → 4-APYR    | 110.0±10.00 <sup>†</sup> |
| Pyridostigmine <sup>3</sup> → 4-APYR | 99.1±14.97 <sup>†</sup>  |

<sup>1</sup> Means±SEM of 4 to 5 experiments in which 90% n.m. block was produced by d-tubocurarine.  
<sup>2</sup> 1 ng/ml; <sup>3</sup> 6 ng/ml; <sup>4</sup> 100 ng/ml.  
\* and † indicate significance at the  $p < 0.001$  and 0.02 levels respectively between the ED<sub>50</sub> of neostigmine or pyridostigmine alone or preceded by 4-aminopyridine and the ED<sub>50</sub> of 4-aminopyridine alone or preceded by neostigmine or pyridostigmine.
